# Supplementary material
Source: Springer Nature journal article supplement (https://mijn.bsl.nl/resource/supplementary/13047_2009_106_MOESM14_ESM.pdf/7109804)

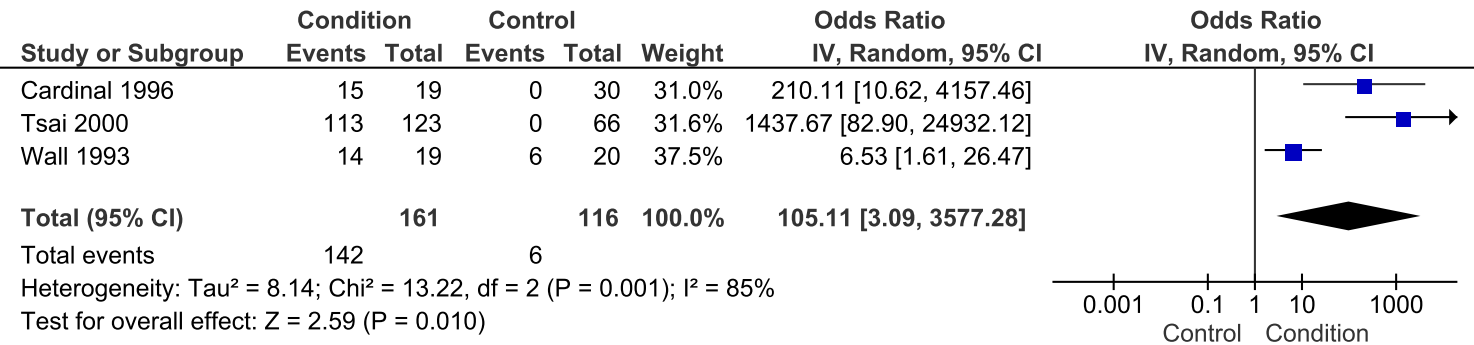

Supplement: MOESM14 [file 7109804]
